# Supplementary material for: Disruption in essential health services in Mexico during COVID-19: an interrupted time series analysis of health information system data
Source: PubMed Central journal article supplement (PMC8413469; doi:10.1136/bmjgh-2021-006204), 2021-09-01
Supplement: bmjgh-2021-006204supp001.pdf [file bmjgh-2021-006204supp001.pdf]

## Disruption in essential health services in Mexico during COVID-19: an interrupted time series analysis

### Supplementary materials

**Supplementary Table 1.** Detailed definitions: service delivery indicators extracted from the Mexican Institute for Social Security (IMSS) routine health information system

| Indicator                                     | Numerator                                                                                                                                                       | Denominator                                                             |
|-----------------------------------------------|-----------------------------------------------------------------------------------------------------------------------------------------------------------------|-------------------------------------------------------------------------|
| <b>Reproductive and maternal health care</b>  |                                                                                                                                                                 |                                                                         |
| Contraceptive users                           | Number of reproductive-age women who used contraceptive services and accepted a contraceptive prescription for the first time or for a refill                   | -                                                                       |
| Antenatal care visits                         | Total number of antenatal care visits (including first and subsequent visits)                                                                                   | -                                                                       |
| Total facility deliveries                     | Number of facility deliveries +<br>Number of caesarean sections                                                                                                 | -                                                                       |
| C-section rate %                              | Number of caesarean sections                                                                                                                                    | Number of facility deliveries<br>+<br>Number of caesarean sections      |
| <b>Child health care</b>                      |                                                                                                                                                                 |                                                                         |
| Number of consultations for sick children     | Number of under-5 children visited primary care clinics for sick childcare including for diarrhea, pneumonia or malnutrition                                    | -                                                                       |
| Number of childhood vaccinations administered | <b>BCG vaccine</b> (Number of children vaccinated with a unique dose of BCG)                                                                                    | -                                                                       |
|                                               | <b>Pentavalent vaccine</b> (Number of children vaccinated with a 3rd dose pentavalent + Number of children vaccinated with a 3rd dose of pentavalent acellular) | -                                                                       |
|                                               | <b>MMR vaccine</b> (Number of children vaccinated with the second dose of the triple viral measles, mumps and rubella vaccine)                                  | -                                                                       |
|                                               | <b>Pneumococcal vaccine</b> (Number of children who received the third dose of pneumococcal vaccine)                                                            | -                                                                       |
|                                               | <b>Rotavirus vaccine</b> (Number of children who received the second dose of the rotavirus vaccine)                                                             | -                                                                       |
| <b>Chronic disease care</b>                   |                                                                                                                                                                 |                                                                         |
| Screened for cervical cancer                  | Number of women aged 25 - 64 screened with Papanicolaou test for cervical cancer                                                                                | -                                                                       |
| Screened for breast cancer                    | Number of women aged 50 - 69 screened for breast cancer for the first time with a mammography                                                                   | -                                                                       |
| Diabetes visits                               | Number of diabetic patients visited primary care clinics (20+ years)                                                                                            | -                                                                       |
| Controlled diabetes %                         | Number of diabetic patients (20+years) with fasting blood glucose tests 70–130 mg/dl                                                                            | Number of diabetic patients visited primary care clinics (20+years)     |
| Hypertension visits                           | Number of hypertensive patients visited primary care clinics (20+ years)                                                                                        | -                                                                       |
| Controlled hypertension %                     | Number of hypertensive patients (20+years) with blood pressure <140/90mmHg                                                                                      | Number of hypertensive patients visited primary care clinics (20+years) |

**Supplementary Table 2. Childhood vaccines administered pre- and during COVID-19, Mexican Institute of Social Security, January 2019-December 2020**

|                                        | Pre-COVID-19 <sup>a</sup><br>N= 15 months |       | During COVID-19<br>N= 9 months |       |
|----------------------------------------|-------------------------------------------|-------|--------------------------------|-------|
|                                        | Average<br>per month                      | SD    | Average<br>per month           | SD    |
| <b>Childhood vaccines</b>              |                                           |       |                                |       |
| BCG vaccine                            | 21,800                                    | 2,420 | 9,881                          | 9,347 |
| Third dose of the Pentavalent vaccine  | 48,608                                    | 8,902 | 17,823                         | 1,594 |
| Second dose of the MMR vaccine         | 6,436                                     | 4,302 | 6,468                          | 2,313 |
| Second dose of the Rotavirus vaccine   | 16,196                                    | 1,108 | 12,024                         | 1,769 |
| Third dose of the Pneumococcal vaccine | 4,688                                     | 444   | 3,111                          | 745   |

<sup>a</sup>The Pre-COVID-19 period is January 2019 to March 2020. The COVID-19 period includes April to December 2020  
 BCG is Bacillus-Calmette Guérin  
 MMR is Measles, Mumps and Rubella

**Supplementary figure 1. Risk ratios for the average effect of COVID-19 (immediate level change) on childhood vaccinations, Mexican Institute of Social Security, January 2019-December 2020**



BCG is Bacillus-Calmette Guérin  
MMR is Measles, Mumps and Rubella
